# Supplementary figures and images for: Unraveling the in vitro antitumor activity of Vismia baccifera against HepG2: role of hydrogen peroxide
Source: PubMed Central journal article supplement — Heliyon. 2018 Jun 29;4(6):e00675. doi: 10.1016/j.heliyon.2018.e00675 (PMC6039853; doi:10.1016/j.heliyon.2018.e00675), 2018-06-29

Figure 3.D.\_Mn-SOD

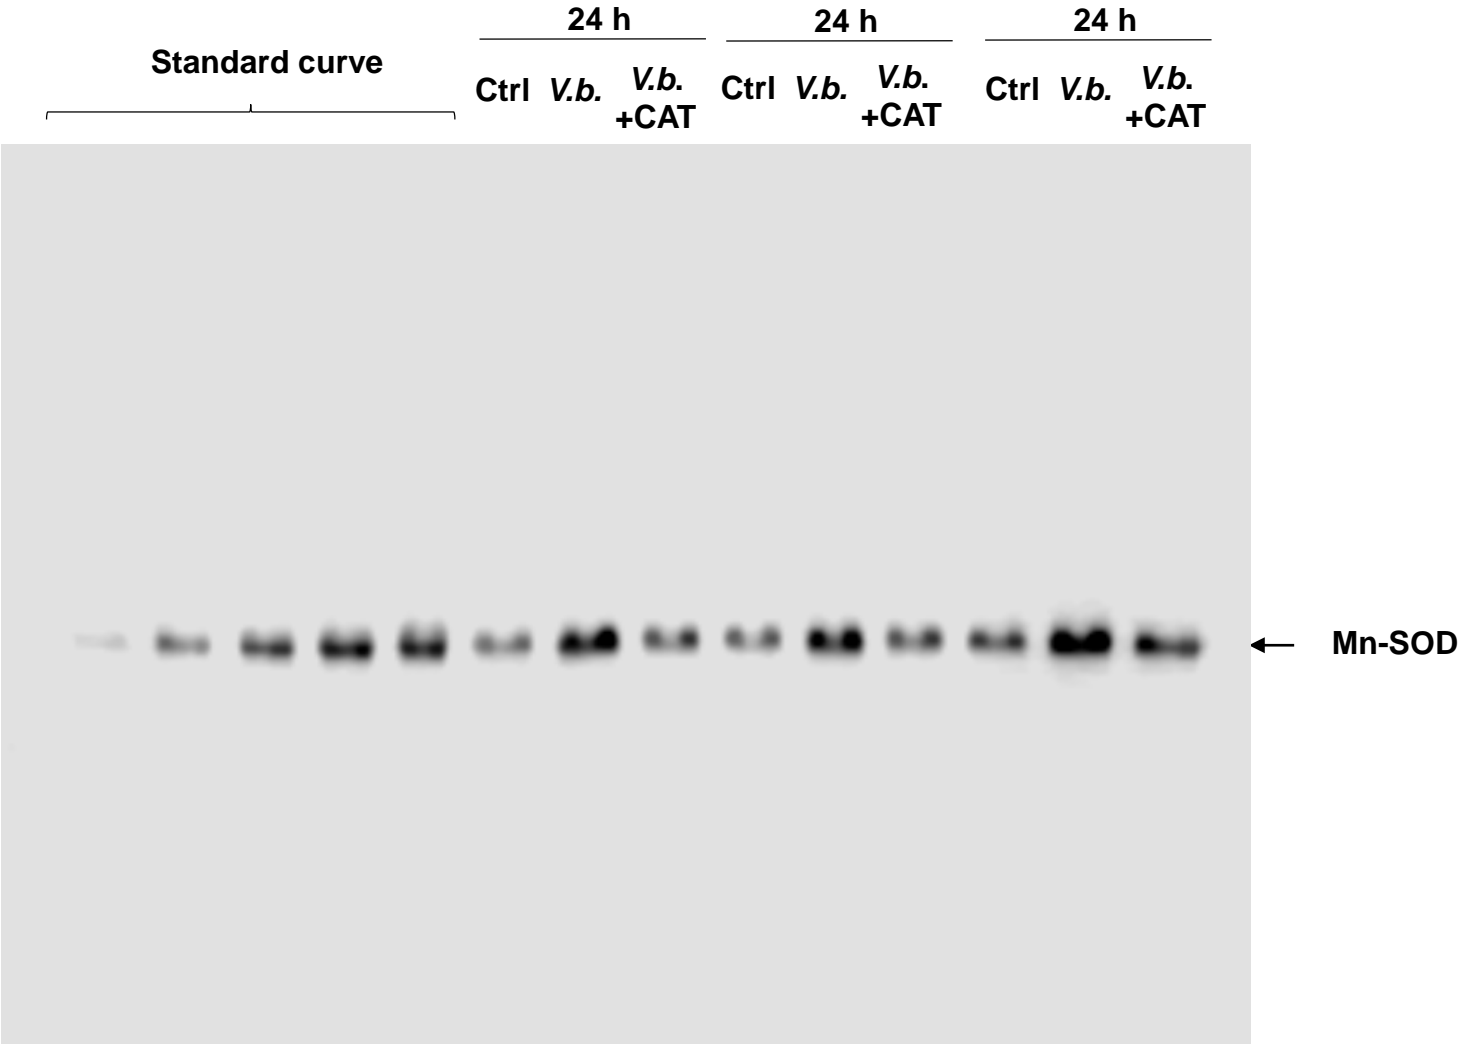

Supplement: mmc1.pdf [file mmc1.pdf]

Figure 5.B.\_PARP

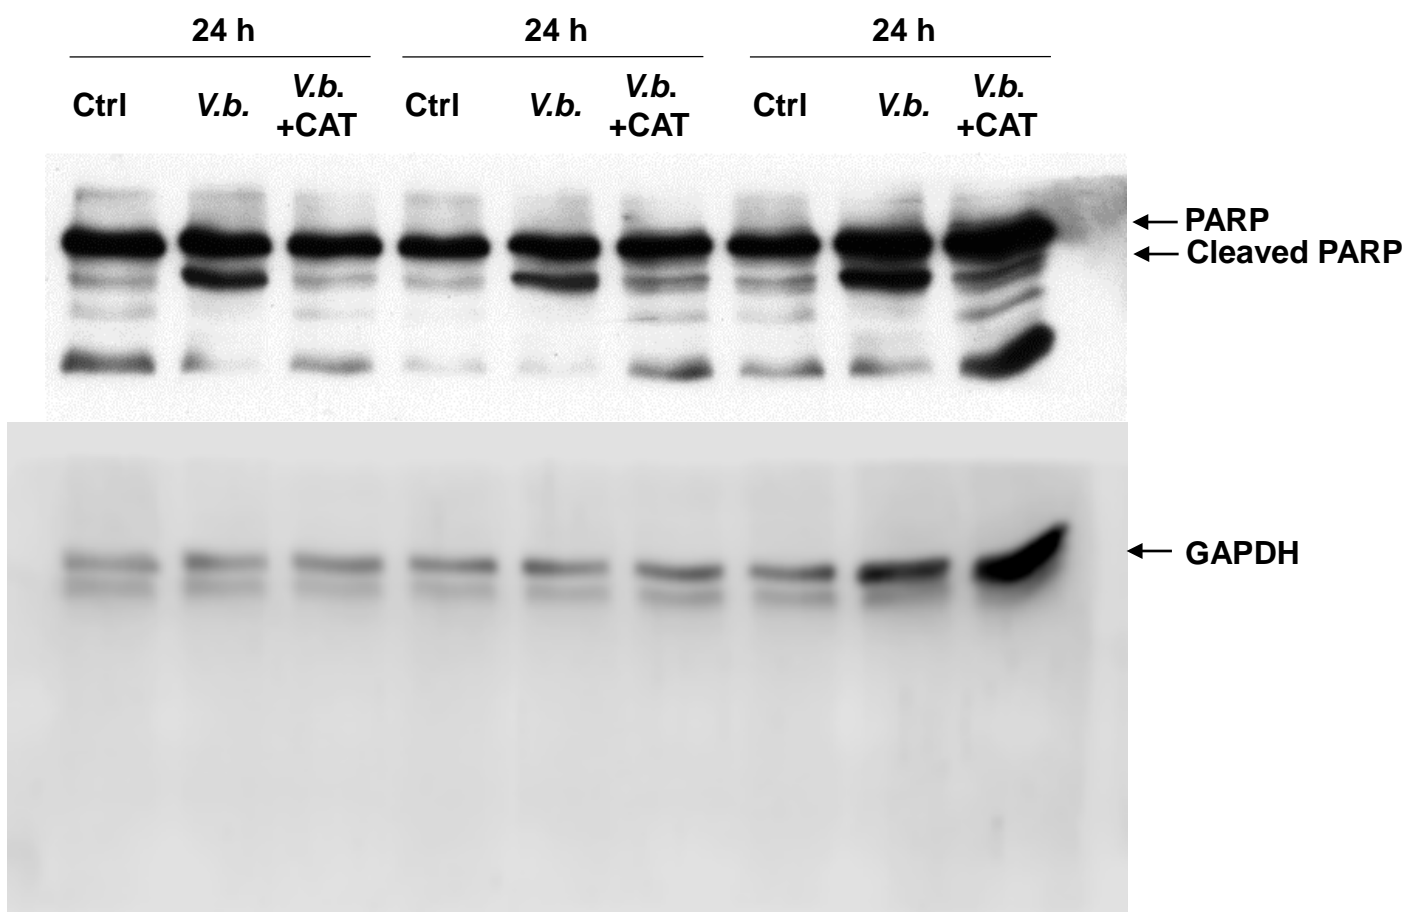

Figure 5.B.\_PARP

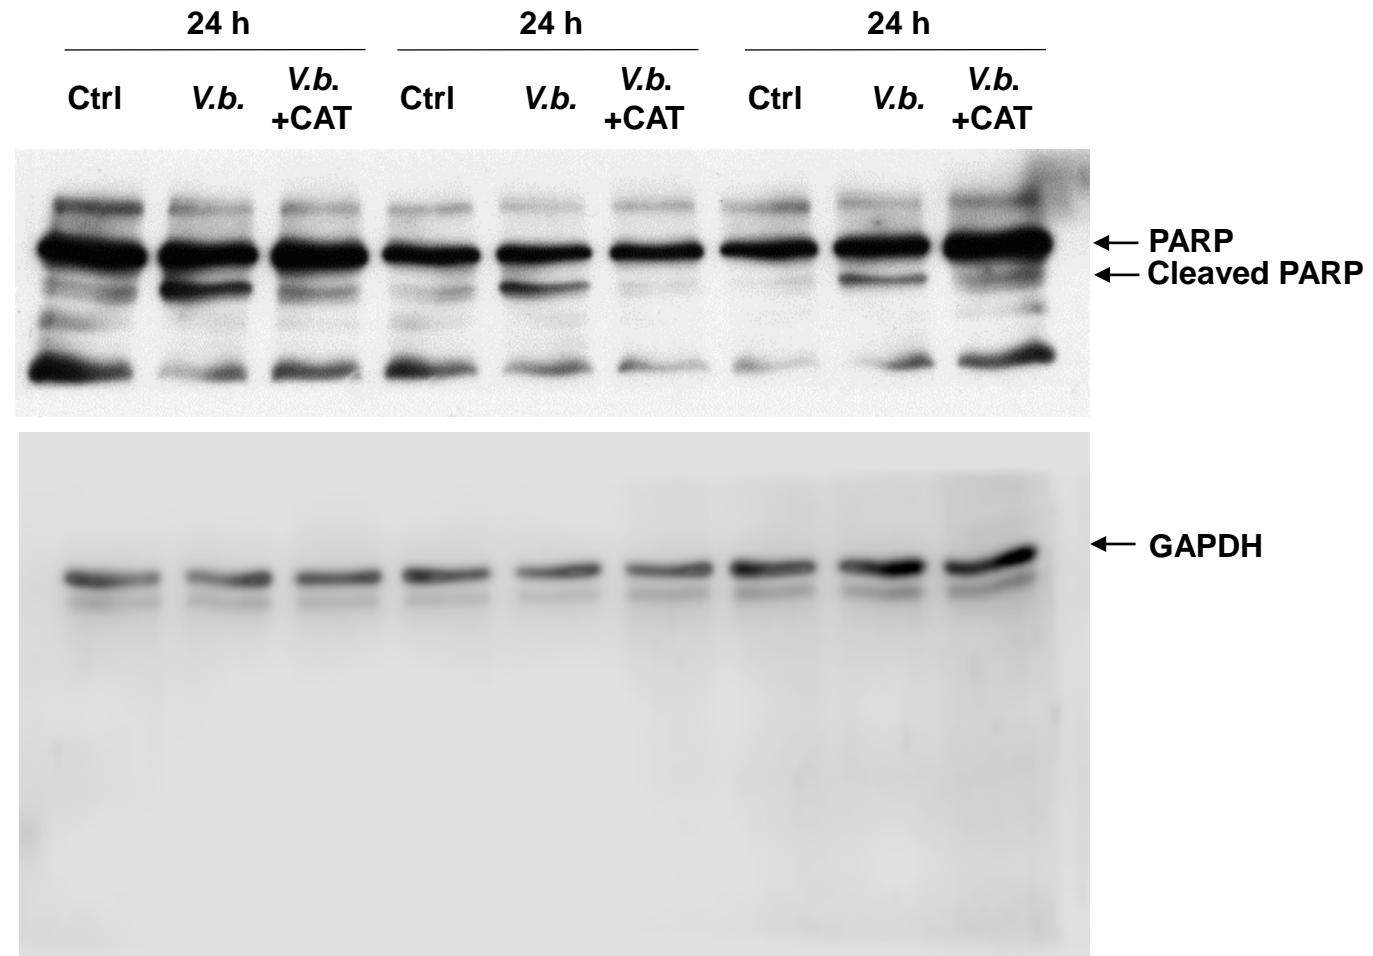



Figure 5.C. Bax\_24 h

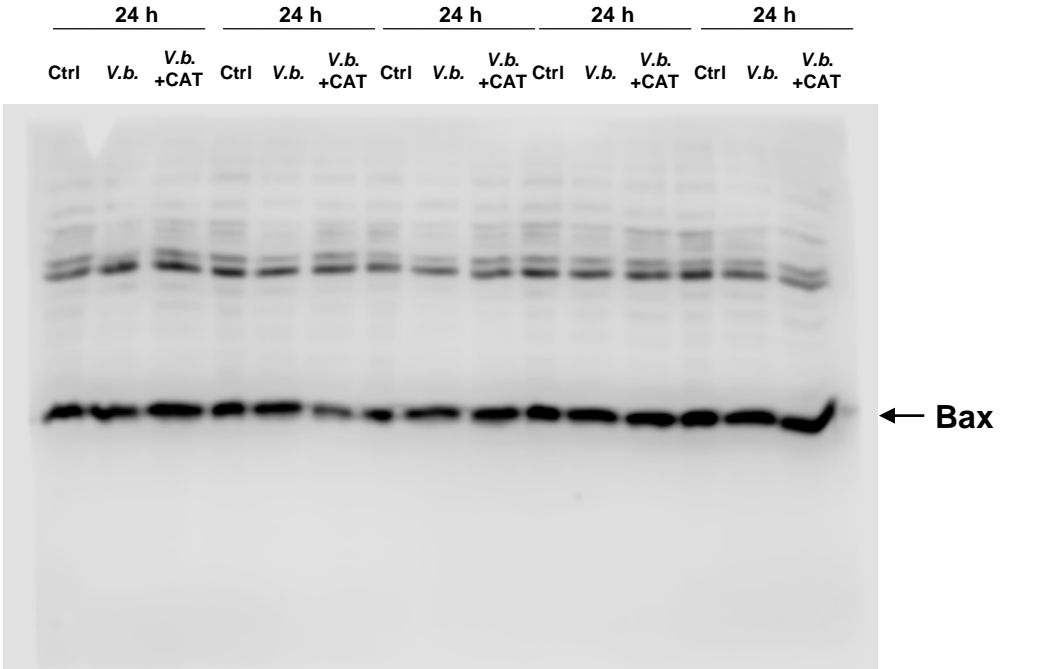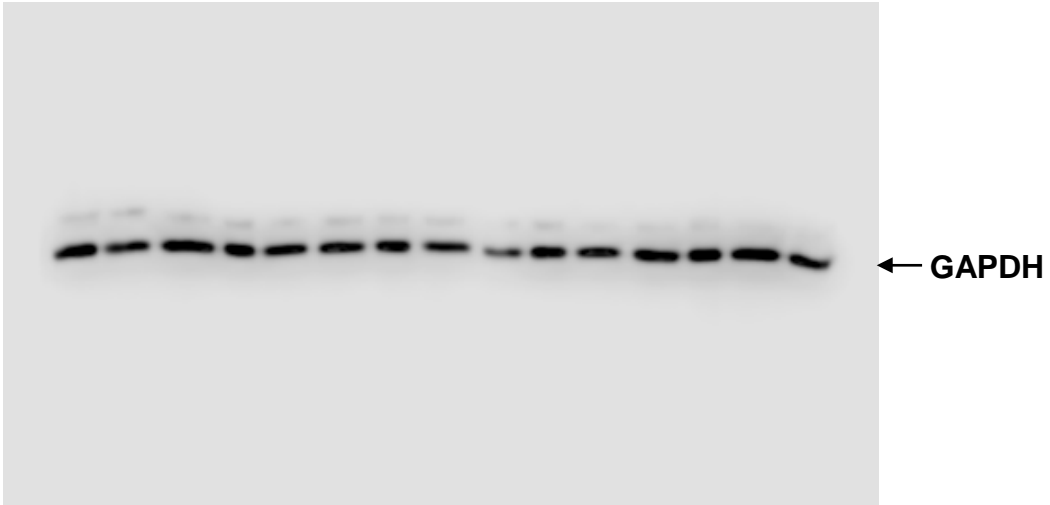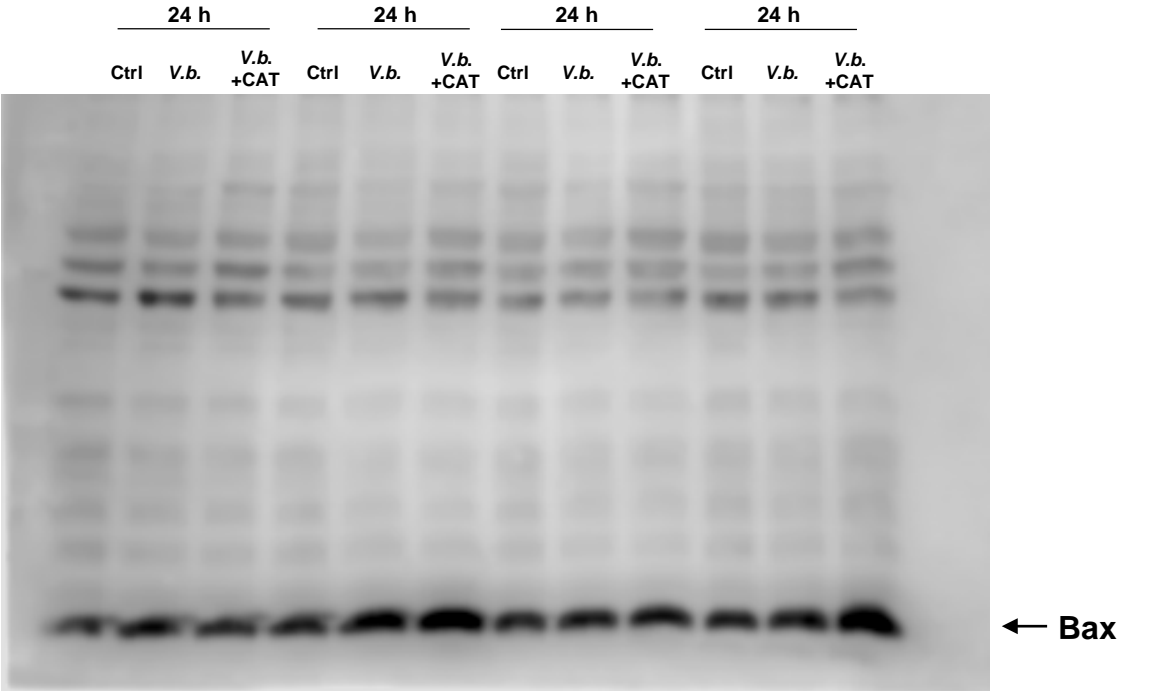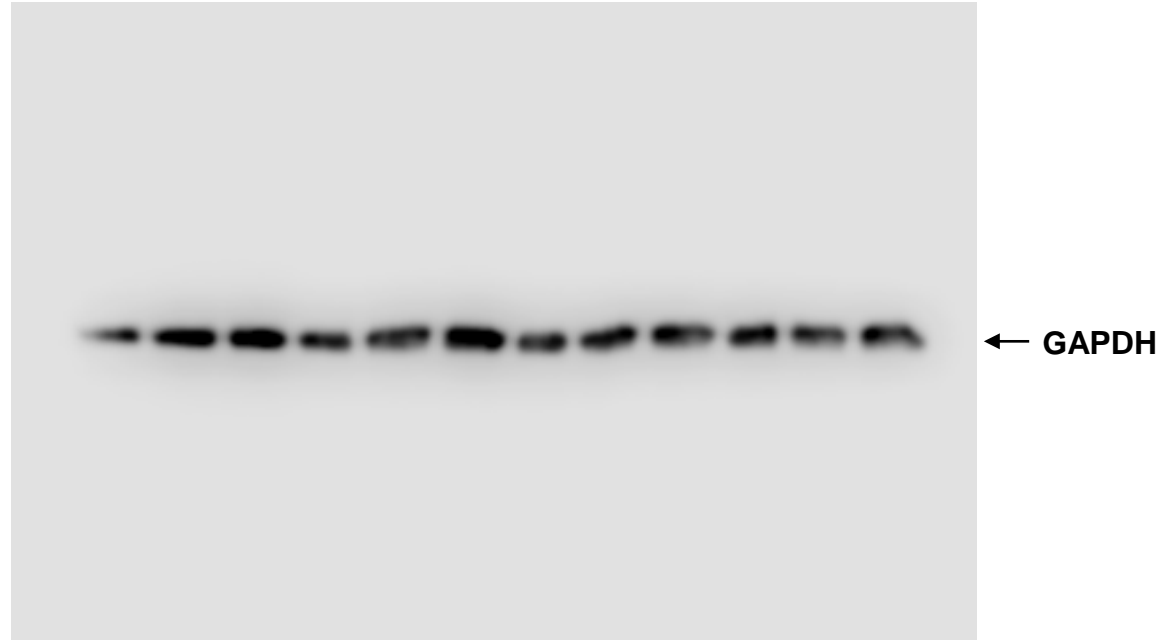

Figure 5.C.\_Bcl-2\_24 h

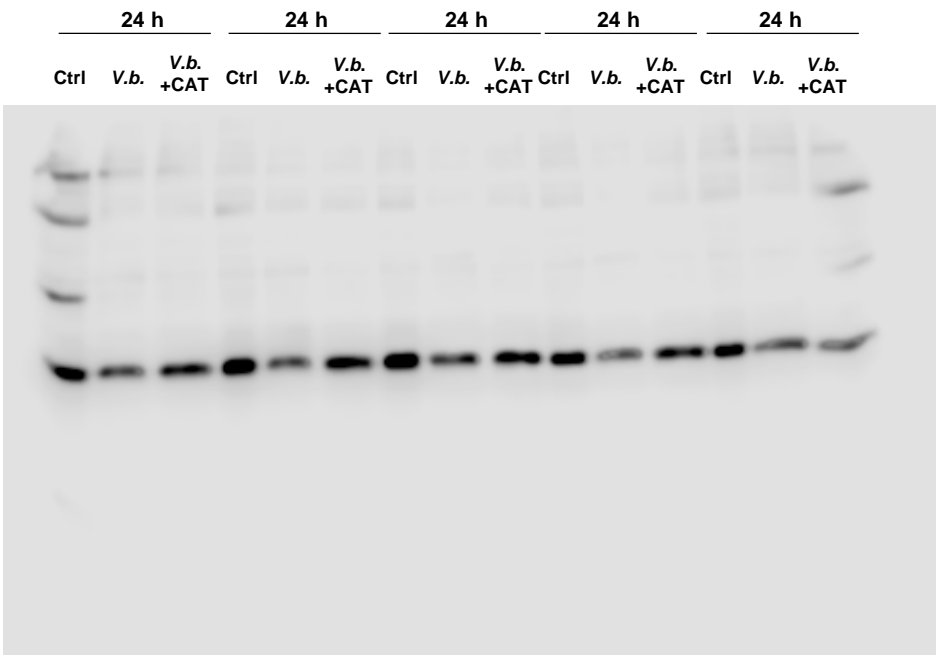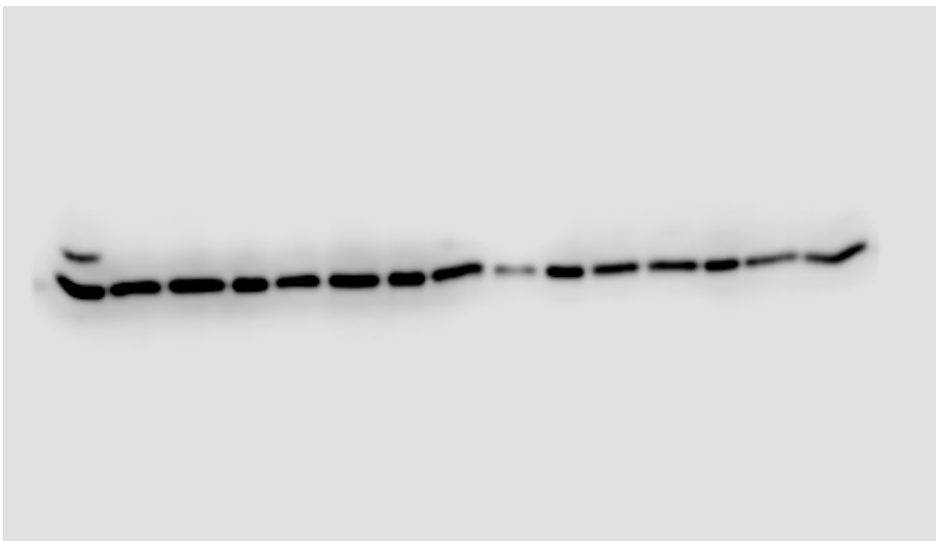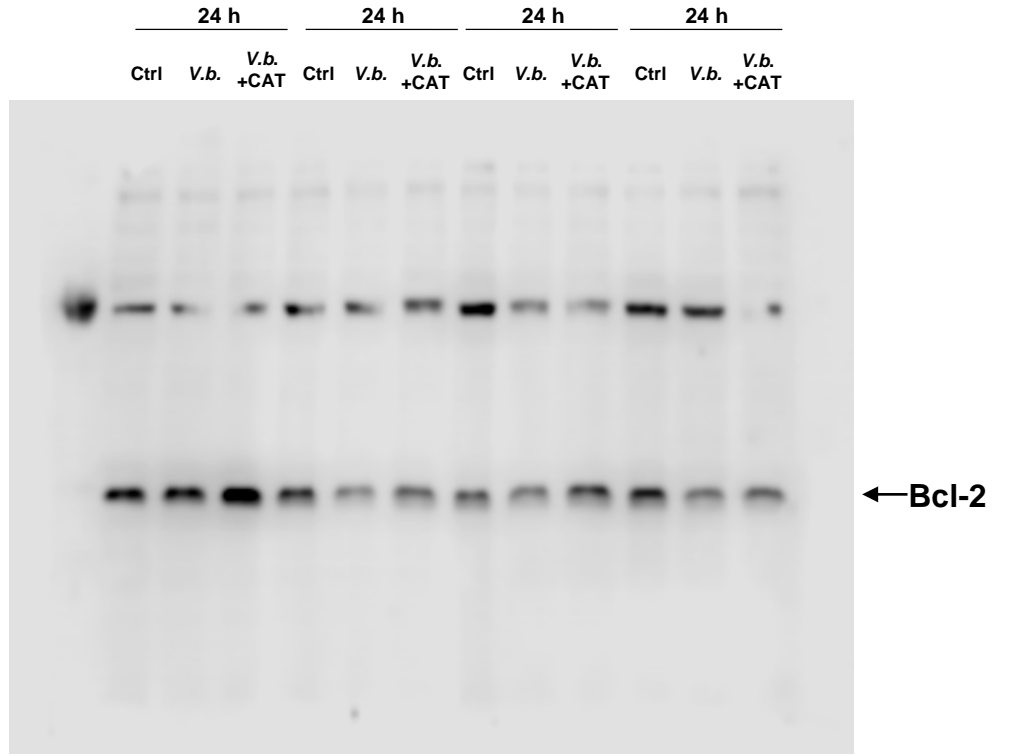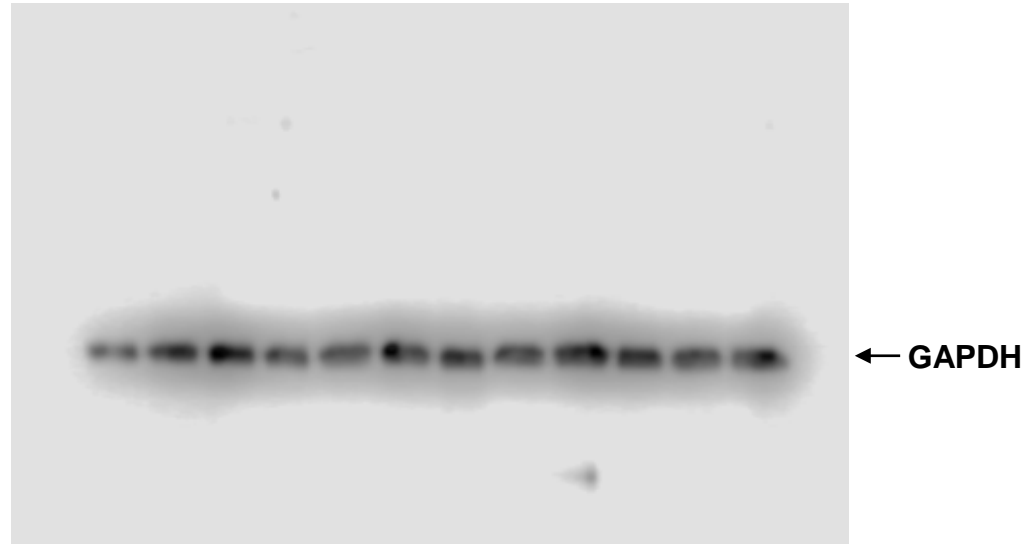

Figure 5.C.\_Bid\_24 h

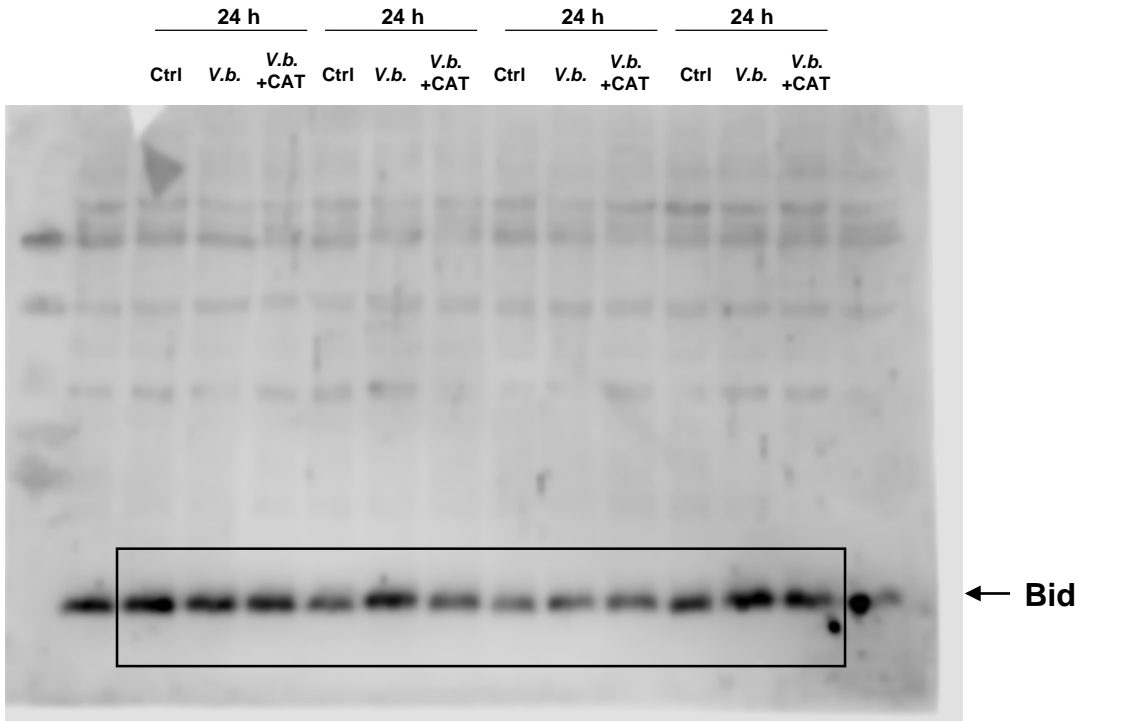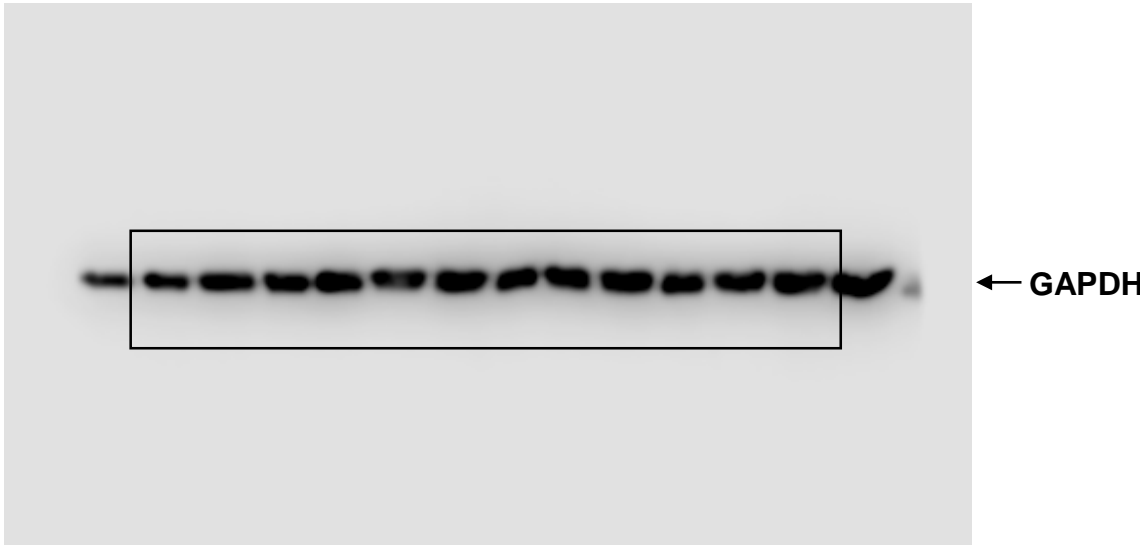

Figure 5.C. *Bcl-X*\_24 h

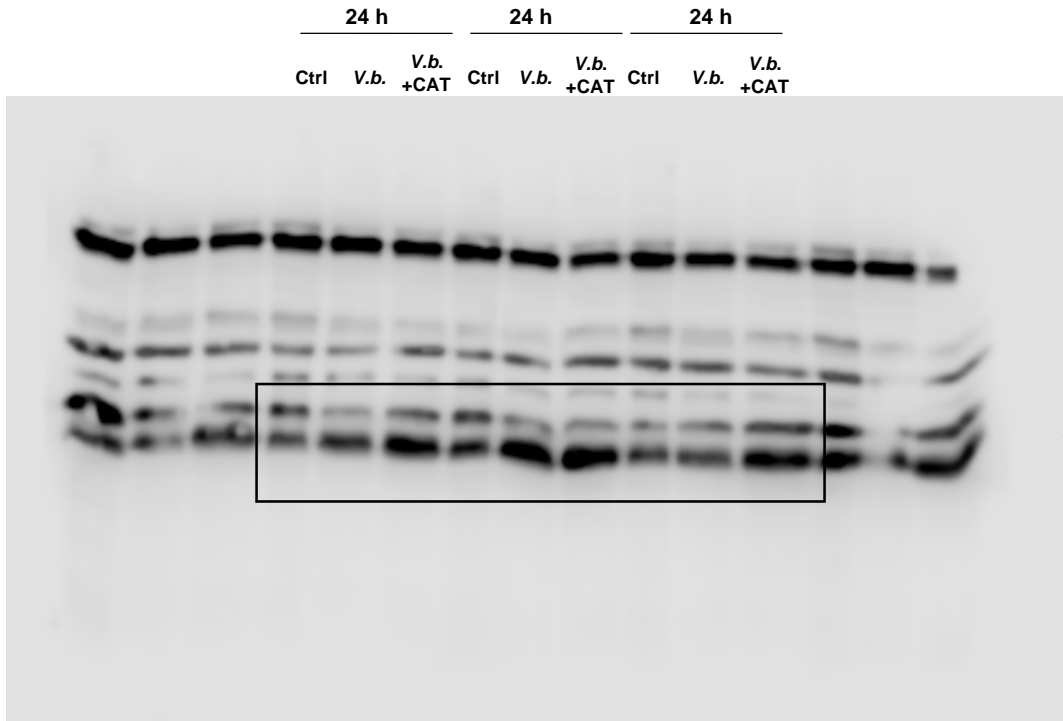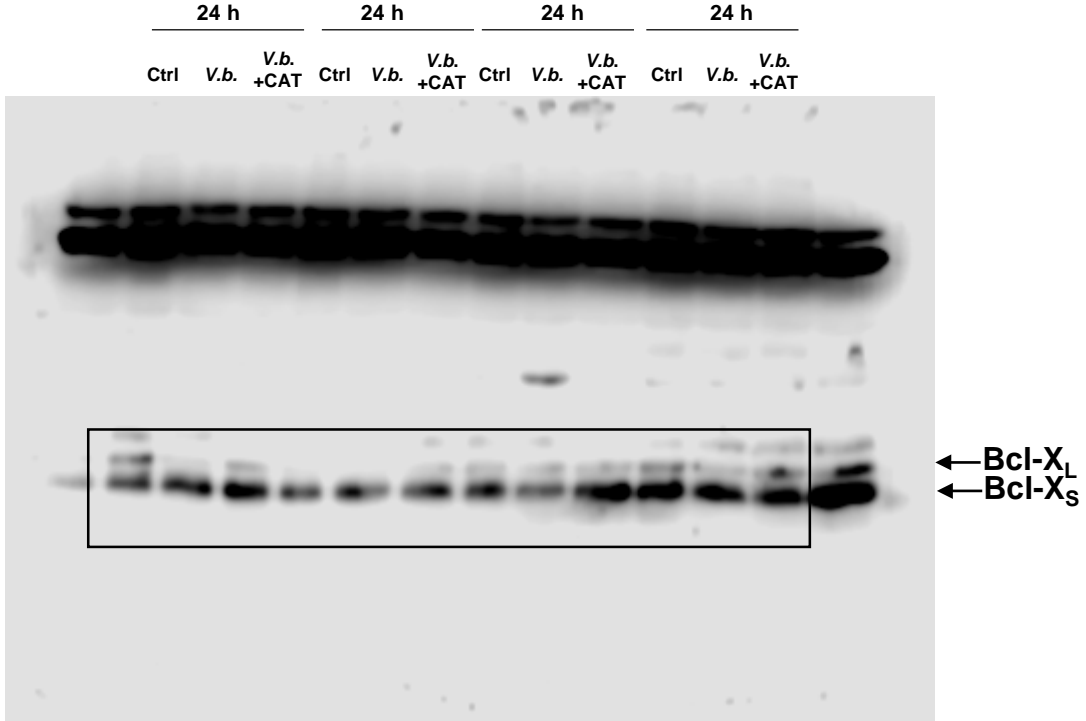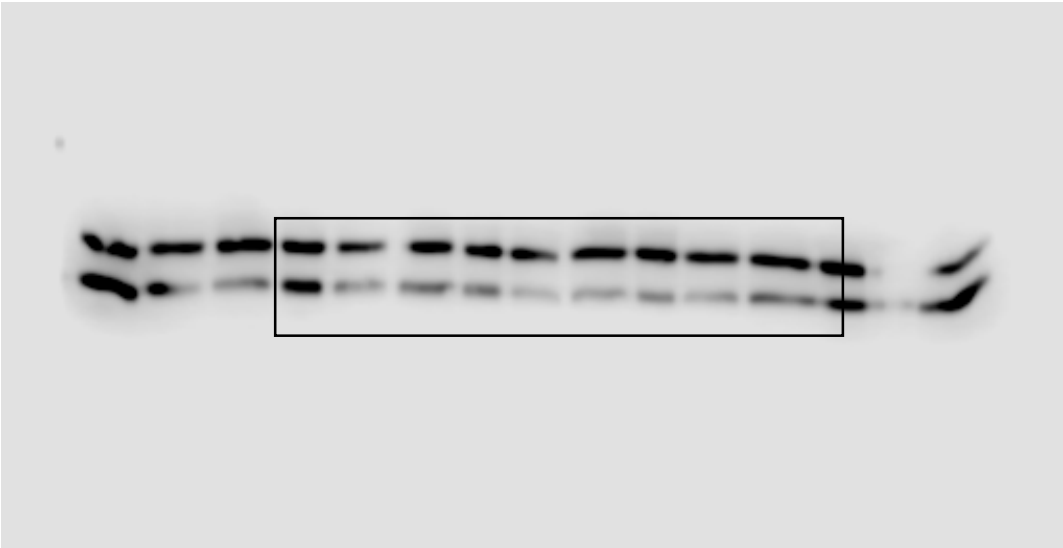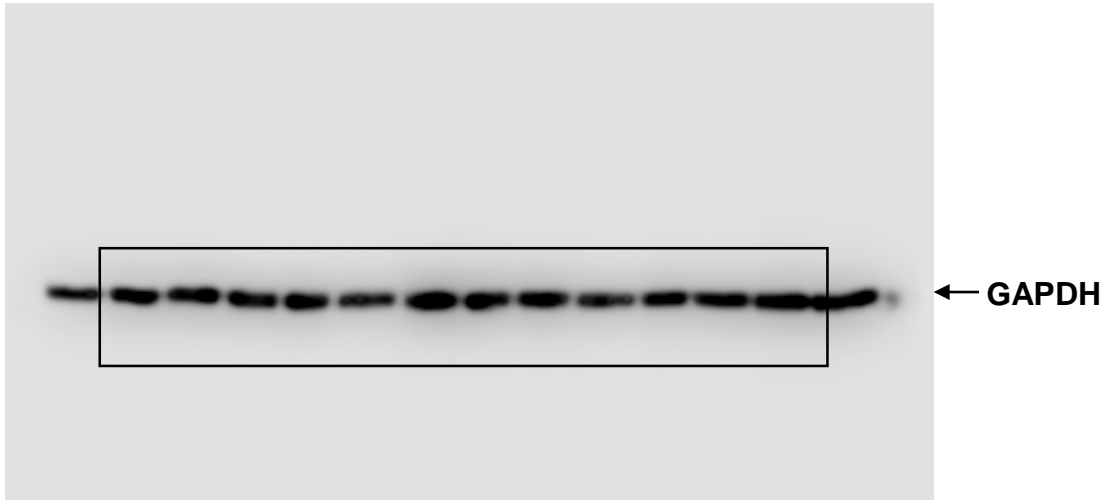

Supplement: mmc3.pdf [file mmc3.pdf]

Figure 6.C.\_p- $\gamma$ H2AX

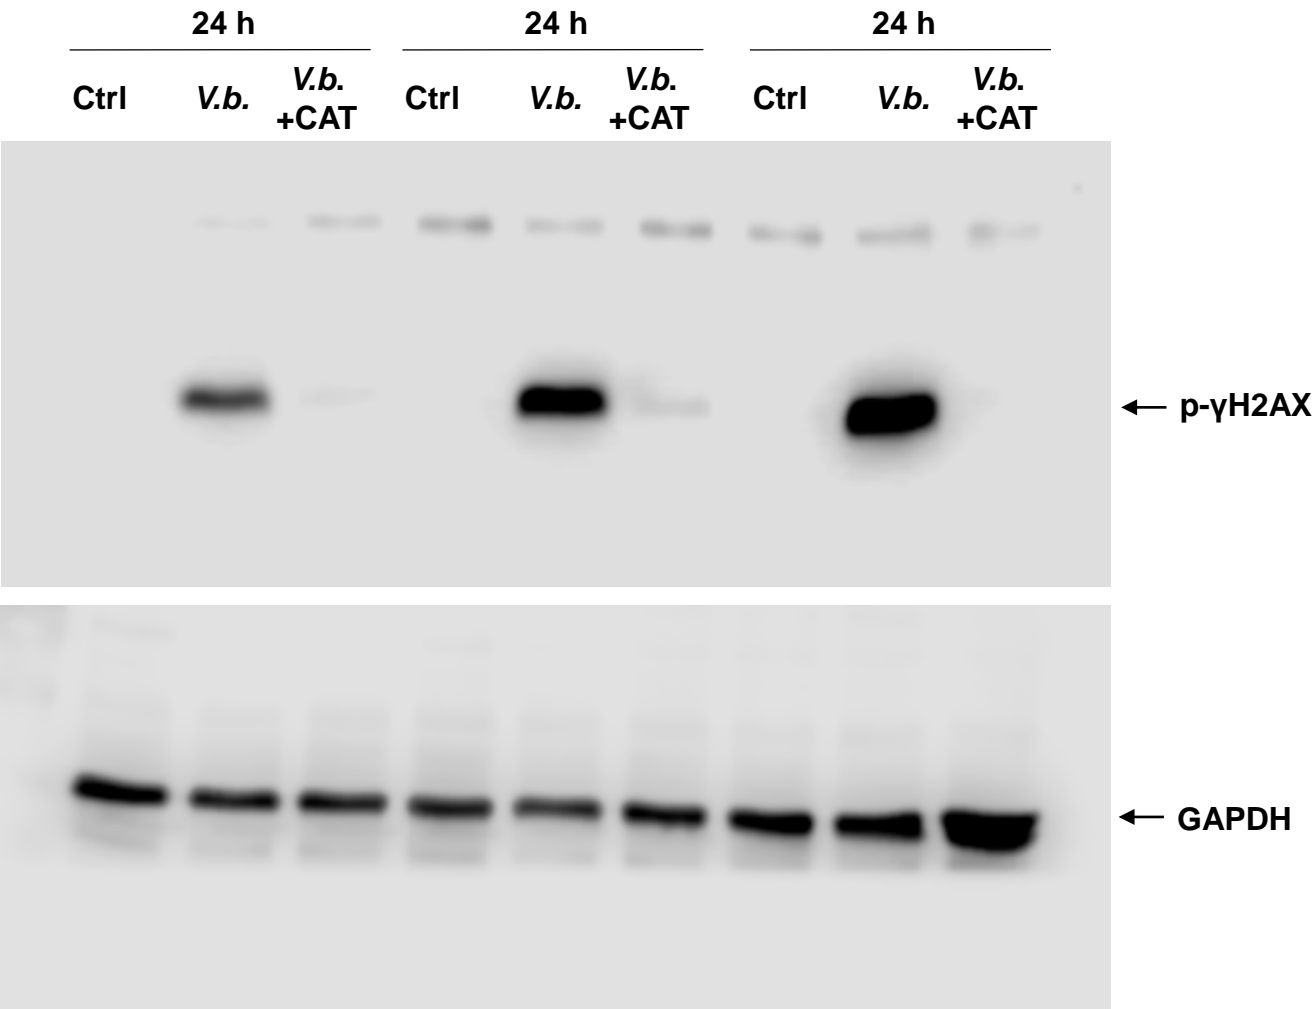

Supplement: mmc4.pdf [file mmc4.pdf]
